# Supplementary material
Source: PubMed Central journal article supplement (PMC3675963)
Supplement: CVI.00758-12_zcd999094749so1.pdf [file CVI.00758-12_zcd999094749so1.pdf]

```

Bb_297_cp32-4      1  MANKNIKLFFFAS--MLFVMAACKAYVEEKKIDSLSLTVSGLNKKIDMKRNNYKQEIINK
Bb_156a_cp32-4    1  MANKNIKLFFFAS--MLFVMAACKAYVEEKKIDSLSLTVSGLNKKIDMKRNNYKQEIINK
Bb_29805_cp32-5   1  MANKNIKLFFFAS--MLFVMAACKAYVEEKKIDSLSLTVSGLNKKIDMKRNNYKQEIINK
Bb_287_cp32-12    1  MANKNIKLFFFAS--MLFVMAACKAYVEEKKIDSLSLTVSGLNKKIDMKRNNYKQEIINK
Bb_Bol26_cp32-12  1  MANKNIKLFFFAS--MLFVMAACKAYVEEKKIDSLSLTVSGLNKKIDMKRNNYKQEIINK
Bb_94a_cp32-6     1  MANKNIFKLFFFS--MLFVMAACKAYVEEKKIDSLSLTVSGLNKKIDMKRNNYKQEIINK
Bb_118a_cp32-6    1  MANKNIFKLFFFS--MLFVMAACKAYVEEKKIDSLSLTVSGLNKKIDMKRNNYKQEIINK
Bs_A14S           1  MANKNIFKLFSSLLMLFVMAACKAYVEEKKIDSLSKPTLNKKIDIEEFKNYKQEIINK
Bs_pCEq17         1  MANKNIFKLFSS--MLFVMAACKAYVEEKKIDSLSKPTLNKKIDIEEFKNYKQEIINK
Bg_PBi_           1  MANKNIFKLFSS--MLFVMAACKAYVEEKKIDSLSKPTLNKKIDIEEFKNYKQEIINK
Bb_N40            1  MANKNIFKLFSS--MLFVMAACKAYVEEKKIDSLSLMEVLAALNDSSGGKFKDYKDKINE
Bb_WI91-23_cp32-10 1  MANKNIFKLFSS--MLFVMAACKAYVEEKKIDSLSLMEVLAALNDSSGGKFKDYKDKINE
Bb_B31_cp32-1     1  MANKNIFKLFSS--MLFVMAACKAYVEEKKIDSLSLMEVLAALNDSSGGKFKDYKDKINE
Bb_WI91-2_cp32-7  1  MANKNIFKLFSS--MLFVMAACKAYVEEKKIDSLSLMEVLAALNDSSGGKFKDYKDKINE
Bb_64b            1  MANKNIFKLFSS--MLFVMAACKAYVEEKKIDSLSLMEVLAALNDSSGGKFKDYKDKINE
Bb_WI91-23_cp32-4  1  MANKNIFKLFSS--MLFVMAACKAYVEEKKIDSLSLMEVLAALNDSSGGKFKDYKDKINE
Bb_118a_cp32-13   1  MANKNIFKLFSS--MLFVMAACKAYVEEKKIDSLSLMEVLAALNDSSGGKFKDYKDKINE
Bb_72a_cp32-13    1  MANKNIFKLFSS--MLFVMAACKAYVEEKKIDSLSLMEVLAALNDSSGGKFKDYKDKINE
Bb_297_cp32-12    1  MANKNIFKLFSS--MLFVMAACKAYVEEKKIDSLSLMEVLAALNDSSGGKFKDYKDKINE
Bb_64b_cp32-5     1  MANKNIFKLFSS--MLFVMAACKAYVEEKKIDSLSLMEVLAALNDSSGGKFKDYKDKINE
Bb_94a_cp32-7     1  MANKNIFKLFSS--MLFVMAACKAYVEEKKIDSLSLMEVLAALNDSSGGKFKDYKDKINE

Bb_297_cp32-4      59  LKESKLDVGNALKEKLLAEESLFQDKLAALKLAALKAARKIEGTTDANNNTARKIWAEE
Bb_156a_cp32-4    59  LKESKLDVGNALKEKLLAEESLFQDKLAALKLAALKAARKIEGTTDANNNTARKIWAEE
Bb_29805_cp32-5   59  LKESKLDVGNALKEKLLAEESLFQDKLAALKLAALKAARKIEGTTDANNNTARKIWAEE
Bb_287_cp32-12    59  LKESKLDVGNALKEKLLAEESLFQDKLAALKLAALKAARKIEGTTDANNNTARKIWAEE
Bb_Bol26_cp32-12  59  LKESKLDVGNALKEKLLAEESLFQDKLAALKLAALKAARKIEGTTDANNNTARKIWAEE
Bb_94a_cp32-6     59  LKESKLDVGNALKEKLLAEESLFQDKLAALKLAALKAARKIEGTTDANNNTARKIWAEE
Bb_118a_cp32-6    59  LKESKLDVGNALKEKLLAEESLFQDKLAALKLAALKAARKIEGTTDANNNTARKIWAEE
Bs_A14S           61  LKERHLDVGNALKEKLLAEESLFQDKLAALKLAALKAARKIEGTTDANNNTARKIWAEE
Bs_pCEq17         59  LKERHLDVGNALKEKLLAEESLFQDKLAALKLAALKAARKIEGTTDANNNTARKIWAEE
Bg_PBi_           59  LKERHLDVGNALKEKLLAEESLFQDKLAALKLAALKAARKIEGTTDANNNTARKIWAEE
Bb_N40            59  LKERHLDVGNALKEKLLAEESLFQDKLAALKLAALKAARKIEGTTDANNNTARKIWAEE
Bb_WI91-23_cp32-10 59  LKERHLDVGNALKEKLLAEESLFQDKLAALKLAALKAARKIEGTTDANNNTARKIWAEE
Bb_B31_cp32-1     59  LKERHLDVGNALKEKLLAEESLFQDKLAALKLAALKAARKIEGTTDANNNTARKIWAEE
Bb_WI91-2_cp32-7  59  LKERHLDVGNALKEKLLAEESLFQDKLAALKLAALKAARKIEGTTDANNNTARKIWAEE
Bb_64b            59  LKERHLDVGNALKEKLLAEESLFQDKLAALKLAALKAARKIEGTTDANNNTARKIWAEE
Bb_WI91-23_cp32-4  59  LKERHLDVGNALKEKLLAEESLFQDKLAALKLAALKAARKIEGTTDANNNTARKIWAEE
Bb_118a_cp32-13   59  LKERHLDVGNALKEKLLAEESLFQDKLAALKLAALKAARKIEGTTDANNNTARKIWAEE
Bb_72a_cp32-13    59  LKERHLDVGNALKEKLLAEESLFQDKLAALKLAALKAARKIEGTTDANNNTARKIWAEE
Bb_297_cp32-12    59  LKERHLDVGNALKEKLLAEESLFQDKLAALKLAALKAARKIEGTTDANNNTARKIWAEE
Bb_64b_cp32-5     59  LKERHLDVGNALKEKLLAEESLFQDKLAALKLAALKAARKIEGTTDANNNTARKIWAEE
Bb_94a_cp32-7     59  LKERHLDVGNALKEKLLAEESLFQDKLAALKLAALKAARKIEGTTDANNNTARKIWAEE

Bb_297_cp32-4      119 SKLVGVTIKFSGSNTGKGAEMSKAEVQIDKIKFLEEGTN
Bb_156a_cp32-4    119 SKLVGVTIKFSGSNTGKGAEMSKAEVQIDKIKFLEEGTN
Bb_29805_cp32-5   119 SKLVGVTIKFSGSNTGKGAEMSKAEVQIDKIKFLEEGTN
Bb_287_cp32-12    119 SKLVGVTIKFSGSNTGKGAEMSKAEVQIDKIKFLEEGTN
Bb_Bol26_cp32-12  119 SKLVGVTIKFSGSNTGKGAEMSKAEVQIDKIKFLEEGTN
Bb_94a_cp32-6     119 SKLVGVTIKFSGSNTGKGAEMSKAEVQIDKIKFLEEGTN
Bb_118a_cp32-6    119 SKLVGVTIKFSGSNTGKGAEMSKAEVQIDKIKFLEEGTN
Bs_A14S           121 AKLVGVTIKFSGSNTGKGAEMSKAEVQIDKIKFLEEGTN
Bs_pCEq17         119 AKLVGVTIKFSGSNTGKGAEMSKAEVQIDKIKFLEEGTN
Bg_PBi_           119 AKLVGVTIKFSGSNTGKGAEMSKAEVQIDKIKFLEEGTN
Bb_N40            119 AKLVGVTIKFSGSNTGKGAEMSKAEVQIDKIKFLEEGTN
Bb_WI91-23_cp32-10 119 AKLVGVTIKFSGSNTGKGAEMSKAEVQIDKIKFLEEGTN
Bb_B31_cp32-1     119 AKLVGVTIKFSGSNTGKGAEMSKAEVQIDKIKFLEEGTN
Bb_WI91-2_cp32-7  119 AKLVGVTIKFSGSNTGKGAEMSKAEVQIDKIKFLEEGTN
Bb_64b            119 AKLVGVTIKFSGSNTGKGAEMSKAEVQIDKIKFLEEGTN
Bb_WI91-23_cp32-4  119 AKLVGVTIKFSGSNTGKGAEMSKAEVQIDKIKFLEEGTN
Bb_118a_cp32-13   117 AKLVGVTIKFSGSNTGKGAEMSKAEVQIDKIKFLEEGTN
Bb_72a_cp32-13    117 AKLVGVTIKFSGSNTGKGAEMSKAEVQIDKIKFLEEGTN
Bb_297_cp32-12    117 AKLVGVTIKFSGSNTGKGAEMSKAEVQIDKIKFLEEGTN
Bb_64b_cp32-5     117 AKLVGVTIKFSGSNTGKGAEMSKAEVQIDKIKFLEEGTN
Bb_94a_cp32-7     117 AKLVGVTIKFSGSNTGKGAEMSKAEVQIDKIKFLEEGTN

```

**Supplemental Figure 1.** Predicted amino acid sequences of RevA proteins of *B. burgdorferi* sensu stricto (strains B31, N40, 297, 156, 29805, Bol26, 94a, 118a, WI-91-23, 72a, 64b), *B. garinii* PBi, and *B. spielmanii* strains A14s and pCEq17. Identical amino acid residues found in the greater than 50% of proteins are boxed and shaded black; similar residues are shaded in gray.

A.

MRNKNIFKLFFAAMLFVMACKAYVEEKKEIDSLMEDVLALVNDSSGGKFKDYKDKINELKENLKDIGNAELKEKLLNLQ  
 NSFQDKLAAKLAALKAAKNTIENITDKDQDISKRKIWSEAKLVGVTPLLGSNTSGNGDKMSKNAVEQIDKVIKFLLEGTN

REVA2: FAAMLFVMACKAYVEEKKEI  
 REVA3: FVMACKAYVEEKKEIDSLME  
 REVA4: KAYVEEKKEIDSLMEDVLA  
 REVA5: EEKKEIDSLMEDVLALVNDSS  
 REVA6: DSLMEDVLALVNDSSGGKFK  
 REVA7: DVLALVNDSSGGKFKDYKDK  
 REVA8: VNDSSGGKFKDYKDKINELK  
 REVA9: GGGKFKDYKDKINELKENLKD  
 REVA10: DYKDKINELKENLKDIGNAE  
 REVA11: INELKENLKDIGNAELKEKL  
 REVA12: ENLKDIGNAELKEKLLNLQN  
 REVA13: IGNAELKEKLLNLQNSFQDK  
 REVA14: LKEKLLNLQNSFQDKLAAKL  
 REVA15: LNLQNSFQDKLAAKLAALKA  
 REVA16: SFQDKLAAKLAALKAAKNTI  
 REVA22: KDQDISKRKIWSEAKLVGVT  
 REVA23: SKRKIWSEAKLVGVTVPLLG  
 REVA24: WSEAKLVGVTVPLLSNTSG  
 REVA25: LVGVTVPLLSNTSGNGDKM

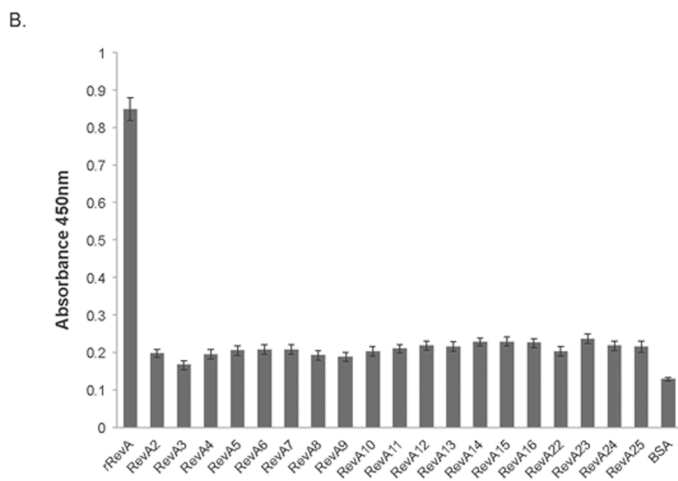

1  
2  
3  
4  
5  
6  
7  
8  
9  
10  
11  
12

**Supplemental Figure 2.** RevA epitope mapping. **A.** Complete amino acid sequence of the *B. burgdorferi* B31 RevA protein. A series of 20 amino acid peptides of RevA were synthesized with 10 amino acid overlap. Underlined residues represent coverage of RevA protein. **B.** Plates were coated with 10 µg/ml recombinant RevA protein or RevA peptides, and recognition of linear peptide epitopes by pooled serum from infected mice was measured by ELISA. Data represent the means and standard errors from 3 separate experiments with 6 wells per condition.
